# Supplementary material
Source: PubMed Central journal article supplement (PMC10152473)
Supplement: NIHMS1892307-supplement-Supplementary_Material.pdf [file NIHMS1892307-supplement-Supplementary_Material.pdf]

SUPPLEMENTAL TABLE 1

## Search terms and strategy for systematic literature review

| Database        | Search query                                                                                                                                                                                                                                                                                                                                                                                                                                                                                                                                                                                                                                                                                                                                                                     | Articles returned (n) |
|-----------------|----------------------------------------------------------------------------------------------------------------------------------------------------------------------------------------------------------------------------------------------------------------------------------------------------------------------------------------------------------------------------------------------------------------------------------------------------------------------------------------------------------------------------------------------------------------------------------------------------------------------------------------------------------------------------------------------------------------------------------------------------------------------------------|-----------------------|
| PubMed          | (((((((“urinary bladder, overactive”[mesh]) OR (overactiv*[tiab] AND (bladder*[tiab] OR detrusor*[tiab])) OR (oab[tiab]) OR (“urinary incontinence, urge”[mesh]) OR (urge incontinen*[tiab]) OR (urinary reflex incontinen*[tiab]) OR (reflex incontinen*[tiab])) AND (((((((genetic phenomena[mesh]) OR (gene expression[mesh]) OR (genetics[mesh]) OR (genetics [subheading]) OR (gene[tiab]) OR (genes[tiab]) OR (genetic*[tiab]) OR (genom*[tiab]) OR (genotyp*[tiab]) OR (biomarker*[tiab])) NOT (animals[mesh] NOT humans[mesh]) AND (english[lang])                                                                                                                                                                                                                       | 444                   |
| Ovid or Medline | exp urinary bladder, overactive overactiv*.ti. or overactiv*. ab. bladder*.ti. or bladder*. ab. or detrusor*.ti. or detrusor*. ab. oab.ti. or oab.ab. exp urinary incontinence, urge urge incontinen*.ti. or urge incontinen*. ab. urinary reflex incontinen*.ti. or urinary reflex incontinen*. ab. reflex incontinen*.ti. or reflex incontinen*. ab. exp genetic phenomena exp gene expression profiling exp genetics genetics.mp. gene.ti. or gene.ab. genes.ti. or genes.ab. genetic*.ti. or genetic*. ab. genom*.ti. or genom*. ab. genotyp*.ti. or genotyp*. ab. biomarker*.ti. or biomarker*. ab. exp animals exp humans                                                                                                                                                  | 410                   |
| Cochrane        | MeSH descriptor: [Urinary Bladder, Overactive] explode all trees (overactiv*):ti OR (overactiv*):ab (bladder*):ti OR (bladder*):ab OR (detrusor*):ti OR (detrusor*):ab (oab):ti OR (oab):ab MeSH descriptor: [Urinary Incontinence, Urge] explode all trees (urge incontinen*):ti OR (urge incontinen*):ab (urinary reflex incontinen*):ti OR (urinary reflex incontinen*):ab (reflex incontinen*):ti OR (reflex incontinen*):ab MeSH descriptor: [Genetic Phenomena] explode all trees MeSH descriptor: [Gene Expression Profiling] explode all trees MeSH descriptor: [Genetics] explode all trees (gene):ti OR (gene):ab (genes):ti OR (genes):ab (genetic*):ti OR (genetic*):ab (genom*):ti OR (genom*):ab (genotyp*):ti OR (genotyp*):ab (biomarker*):ti OR (biomarker*):ab | 34                    |

MeSH, Medical Subject Headings.

Isali. Gene expression in overactive bladder patients. *Am J Obstet Gynecol* 2023.

**SUPPLEMENTAL TABLE 2****Newcastle-Ottawa Quality Assessment Scale for the included datasets**

| Included studies                    | Selection | Comparability | Exposure |
|-------------------------------------|-----------|---------------|----------|
| O'reilly et al, <sup>22</sup> 2002  | **        | ***           | ***      |
| Maake et al, <sup>23</sup> 2006     | **        | ***           | ***      |
| Moore et al, <sup>24</sup> 2001     | **        | ***           | ***      |
| Schofield et al, <sup>25</sup> 2005 | **        | **            | ***      |
| Mukerji et al, <sup>26</sup> 2006   | ***       | **            | ***      |
| Roosen et al, <sup>27</sup> 2009    | **        | **            | **       |
| Neuhaus et al, <sup>28</sup> 2005   | **        | ***           | ***      |
| Roberts et al, <sup>29</sup> 2020   | ***       | **            | **       |
| Mukerji et al, <sup>30</sup> 2006   | ***       | ***           | **       |

Overall, the included studies had fair to good quality: good quality, 3 or 4 stars in the selection domain, 1 or 2 stars in the comparability domain, and 2 or 3 stars in the exposure domain; fair quality, 2 stars in the selection domain, 1 or 2 stars in the comparability domain, and 2 or 3 stars in the exposure domain; and poor quality, 0 or 1 star in the selection domain, 0 star in the comparability domain, or 0 or 1 star in the exposure domain.

*Isali. Gene expression in overactive bladder patients. Am J Obstet Gynecol 2023.*

## SUPPLEMENTAL TABLE 3

## Joanna Briggs Institute critical appraisal checklist applied for included studies in the systematic review

| Questions                                                                                                     | O'reilly<br>et al, <sup>22</sup><br>2002 | Maake<br>et al, <sup>23</sup><br>2006 | Moore<br>et al, <sup>24</sup><br>2001 | Schofield<br>et al, <sup>25</sup><br>2005 | Mukerji<br>et al, <sup>26</sup><br>2006 | Roosen<br>et al, <sup>27</sup><br>2009 | Neuhaus<br>et al, <sup>28</sup><br>2005 | Roberts<br>et al, <sup>29</sup><br>2020 | Mukerji<br>et al, <sup>30</sup><br>2006 |
|---------------------------------------------------------------------------------------------------------------|------------------------------------------|---------------------------------------|---------------------------------------|-------------------------------------------|-----------------------------------------|----------------------------------------|-----------------------------------------|-----------------------------------------|-----------------------------------------|
| Were the groups comparable other than the presence of disease in cases or the absence of disease in controls? | Yes                                      | Yes                                   | Yes                                   | Yes                                       | Yes                                     | Yes                                    | Yes                                     | Yes                                     | Yes                                     |
| Were cases and controls matched appropriately?                                                                | Yes                                      | Yes                                   | Yes                                   | Yes                                       | Yes                                     | Yes                                    | Yes                                     | Yes                                     | Yes                                     |
| Were the same criteria used for identification of cases and controls?                                         | NA                                       | NA                                    | Yes                                   | NA                                        | Yes                                     | Yes                                    | Yes                                     | Yes                                     | Yes                                     |
| Was exposure measured in a standard, valid and reliable way?                                                  | Yes                                      | Yes                                   | Yes                                   | Yes                                       | Yes                                     | Yes                                    | Yes                                     | Yes                                     | Yes                                     |
| Was exposure measured in the same way for cases and controls?                                                 | Yes                                      | Yes                                   | Yes                                   | Yes                                       | Yes                                     | Yes                                    | Yes                                     | Yes                                     | Yes                                     |
| Were confounding factors identified?                                                                          | Yes                                      | Yes                                   | Yes                                   | Yes                                       | Yes                                     | Yes                                    | Yes                                     | Yes                                     | Yes                                     |
| Were strategies to deal with confounding factors stated?                                                      | Yes                                      | Yes                                   | Yes                                   | Yes                                       | Yes                                     | Yes                                    | Yes                                     | Yes                                     | Yes                                     |
| Were outcomes assessed in a standard, valid and reliable way for cases and controls?                          | NA                                       | NA                                    | NA                                    | NA                                        | NA                                      | NA                                     | NA                                      | NA                                      | NA                                      |
| Was the exposure period of interest long enough to be meaningful?                                             | Yes                                      | Yes                                   | Yes                                   | Yes                                       | Yes                                     | Yes                                    | Yes                                     | Yes                                     | Yes                                     |
| Was appropriate statistical analysis used?                                                                    | Yes                                      | Yes                                   | Yes                                   | Yes                                       | Yes                                     | Yes                                    | Yes                                     | Yes                                     | Yes                                     |

NA, not applicable.

Isali. Gene expression in overactive bladder patients. *Am J Obstet Gynecol* 2023.
